# Supplementary material for: Quantitative Characteristics of Gene Regulation by Small RNA
Source: PubMed Central journal article supplement (PMC1994261; doi:10.1371/journal.pbio.0050229), 2007-08-21
Supplement: pbio.0050229.st003.pdf [file pbio.0050229.st003.pdf]

| Target | small RNA source                                    | background                                  |                            |
|--------|-----------------------------------------------------|---------------------------------------------|----------------------------|
| ZZS    | 0 none                                              | 0 none                                      |                            |
|        | 1 pZE12G P <sub>Llac-O1</sub> -gfp                  | 1 pZA31-luc P <sub>Ltet-O1</sub> -luc       | q <i>hfq</i> <sup>-</sup>  |
|        | 2 pZE12S P <sub>Llac-O1</sub> - <i>crsodB</i> -gfp  | 2 chromosomal <i>ryhB</i>                   | s <i>sodB</i> <sup>-</sup> |
|        | 3 pZE12IS P <sub>Llac-O1</sub> - <i>cris10</i> -gfp | 3 pZA31R P <sub>Ltet-O1</sub> - <i>ryhB</i> |                            |
|        | 4 $\Phi$ ( <i>crsodB</i> -gfp)                      | 4 pZA30R P <sub>ryhB</sub> - <i>ryhB</i>    |                            |
|        | 5 pZA31O P <sub>Ltet-O1</sub> - <i>is10out</i>      |                                             |                            |

**Table S3.** Naming scheme for strains used in this study.
