# Supplementary material for: Quantitative Characteristics of Gene Regulation by Small RNA
Source: PLOS journal article supplement (doi:10.1371/journal.pbio.0050229), 2007-08-16
Supplement: S1 (10.1371/journal.pbio.0050229.s001) [file journal.pbio.0050229.s001]

**a**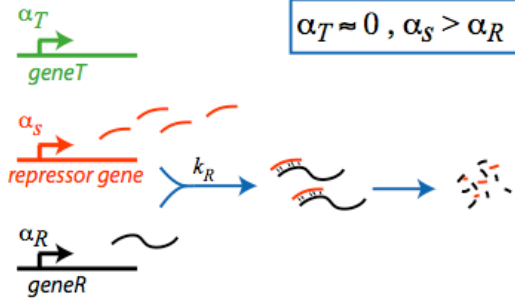**b**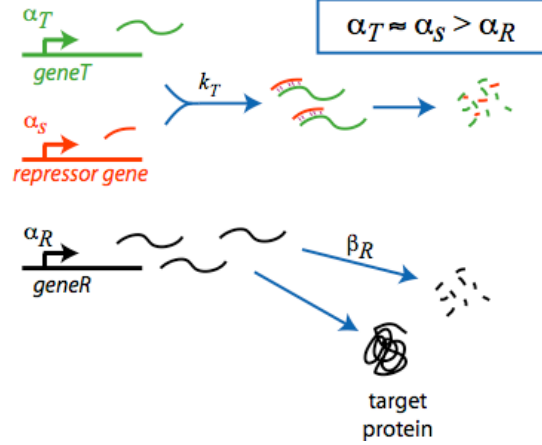

**Figure S1.** Model for indirect interaction between different targets of a small RNA, in the case  $k_T \gg k_R$ . When *geneT* is not expressed, the small RNA silences the expression of *geneR*. When *geneT* is expressed, most sRNA molecules bind and degrade with mRNAs of *geneT*, allowing mRNAs of *geneR* to be translated into proteins.
